# Supplementary material for: An overview of the CellML API and its implementation
Source: Springer Nature journal article supplement (doi:10.1186/1471-2105-11-178), 2010-04-08

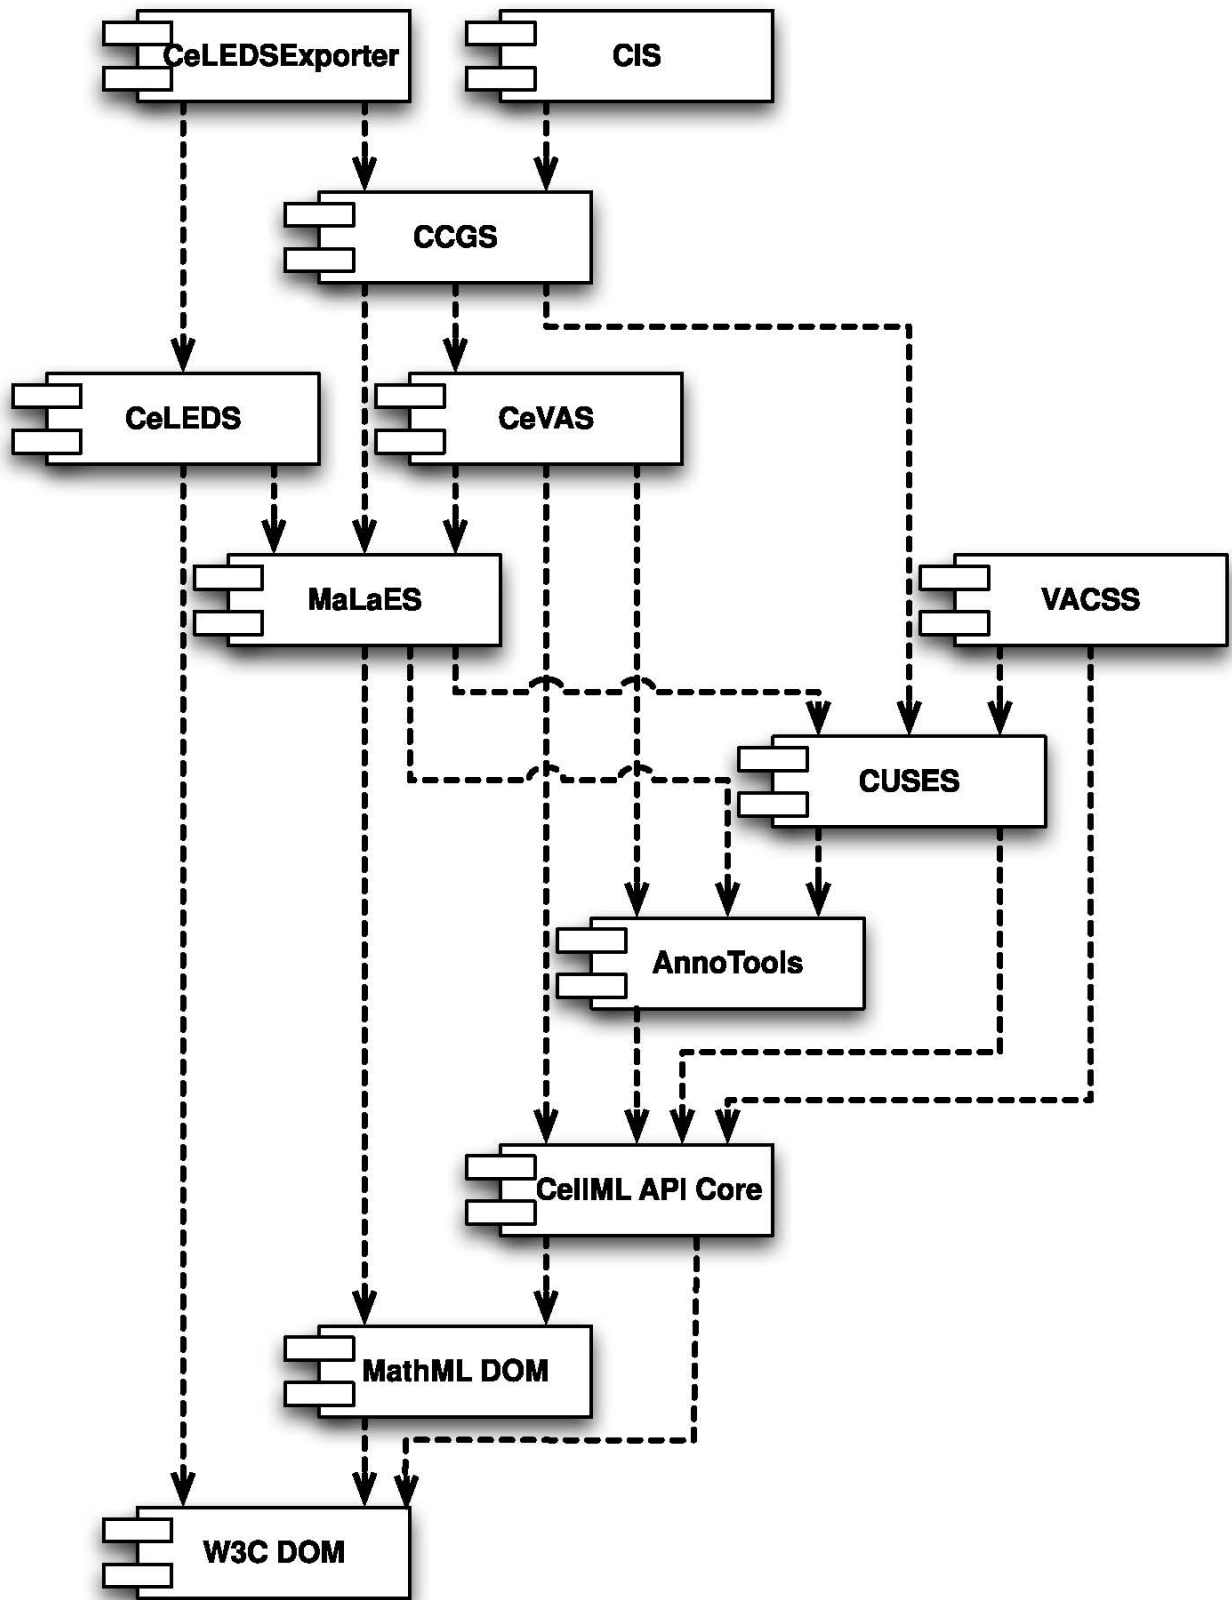

Supplement: 12859_2009_3635_MOESM1_ESM.pdf [file 12859_2009_3635_MOESM1_ESM.pdf]
